# Supplementary material for: The ‘what’ and ‘how’ of screening for social needs in healthcare settings: a scoping review
Source: PeerJ. 2023 Apr 21;11:e15263. doi: 10.7717/peerj.15263 (PMC10124546; doi:10.7717/peerj.15263)
Supplement: Supplemental Information 3 [file peerj-11-15263-s003.xlsx]

## Sheet: All data
											Where possible, provide details of all items that screen for SDH/Social needs here:																			Provide details of all items that do not fit in any of the green boxes (but do relate to one of the PROGRESS characteristics) here:
																														P		R		O		G		R		E		S		S		+		+
Reviewer	Reference Number	Citation (author, year)	Title	Country (Language if not English)		Identify the study population	Identify the clinical setting (verbatim text)	Screening tool name (if applicable),	Tool validation Has the screening tool been validated? 1. Yes 2. No 3. Partially 4. Not specified	Tool development/ validation processes description and results (if applicable)	A. Does the tool include at least one question related to education? (early childhood education, education level, literacy) 1. Yes 2. No	If YES to A: provide question and response options relevant to education	B. Does the tool include at least one question related to economic stability? (e.g. employment, income, expenses) 1. Yes 2. No	If YES to B: provide question and response options relevant to economic stability	C. Does the tool include at least one question related to social & community context? (e.g. social support systems, community engage-ment, immigrant/ refugee status) 1. Yes 2. No	If YES to C: provide question and response options relevant to social and community context	D. Does the tool include at least one question related to health and clinical care? (e.g. access, coverage, provider availability, cultural competence) 1. Yes 2. No	If YES to D: provide question and response options relevant to health and clinical care	E. Does the tool include at least one question related to neighbourhood and physical environment? (e.g. housing, transportation, safety, crime) 1. Yes 2. No	If YES to E: provide question and response options relevant to neighbourhood and physical environment	F. Does the tool include at least one question related to food? (e.g. food insecurity, access to healthy options) 1. Yes 2. No	If YES to F: provide question and response options relevant to food	G. Does the tool include at least one question related to utility needs? (e.g. heat electricity, natural gas, hot water) 1. Yes 2. No	If YES to G: provide question and response options relevant to utility needs:	H. Does the tool include at least one question related to transportation barriers? 1. Yes 2. No	If YES to H: provide question and response options relevant to transportation barriers:	I. Does the tool include at least one question related to interpersonal violence or safety? 1. Yes 2. No	If YES to I: provide question and response options relevant to interpersonal violence or safety:	Uncategorised questions	Does the tool include a question related to Place? 1. Yes 2. No	If YES, provide question and response options relevant to place:	Does the tool include a question related to Race/ethnicity/ language/culture? 1. Yes 2. No	If YES, provide question and response options relevant to Race/ethnicity/ language/culture	Does the tool include a question related to Occupation? 1. Yes 2. No	If YES, provide question and response options relevant to Occupation	Does the tool include a question related to Sex/Gender? 1. Yes 2. No	If YES, provide question and response options relevant to sex/gender:	Does the tool include a question related to Religion? 1. Yes 2. No	If YES, provide question and response options relevant to Religion	Does the tool include a question related to Education? 1. Yes 2. No	If YES, provide question and response options relevant to Education:	Does the tool include a question related to Socioeconomic status? 1. Yes 2. No	If YES, provide question and response options relevant to	Does the tool include a question related to Social capital? 1. Yes 2. No	If YES, provide question and response options relevant to	Does the tool include a question related to Plus 1 (age, disability, sexual preference)? 1. Yes 2. No	If YES, provide question and response options relevant to Plus 1:	Does the tool include a question related to Plus 2 (features of relationships)? 1. Yes 2. No	If YES, provide question and response options relevant to
EK	1	Barcelos Winchester, 2019	Social Determinants of Health Assessment Tool: Implications for Healthcare Practice	USA	adult	Delphi panel with experts in social work, nursing, public health, and psychology	Not specified	N/a	3	Delphi process to develop, face validity established	1	What is client’s highest level of education? Elementary or Middle School> General Education Development/High School> Vocational/Technical School> Community College> College/University (BA, BS)> Graduate Degree> Do not know/unable to answer	1	Primary financial support: Self> Spouse/Partner/Significant Other> Parent> Disability (SSI or SSD)> Government/Public Assistance> Social Security Retirement> Retirement (not social security)> Other (please specify)> Do not know/unable to answer	1	How often does client rely on public assistance? Check off all that apply (a-f)	1	How often does client have difficulty seeing their primary care provider/health provider (i.e.,doctor,physician,nurse practitioner) when needed? Never> Rarely> Sometimes> Often> Always> Not Applicable	1	Housing Status: Rent apartment/house> Own condominium/house> Homeless/Homeless shelter> Do not know/unable to answer	1	How often is client able to afford to buy healthy food for themselves and family? Never> Rarely> Sometimes> Often> Always> Not Applicable	1	How often does client have enough money for house or apartment,and bills? Never> Rarely> Sometimes> Often> Always> Not Applicable	1	How often does client have access to owning their own car? Never> Rarely> Sometimes> Often> Always> Not Applicable	1	How often does client feel safe at home? Never> Rarely> Sometimes> Often> Always> Not Applicable	How often does client experience daily discrimination? Never> Rarely> Sometimes> Often> Always> NotApplicable			1	What is client’s identified race? White> Black/African American> Asian> American Indian/Alaska Native> Native Hawaiian/Pacific Islander> More than one race> Other Identified> Do not know/unable to answer			1	What is client’s gender presentation? Female> Male> Other Gender-Identified> Do not know/unable to answer									1	Age: What is client’s age group? Infant (0–12 months)> Toddler (1y-3y)> Preschool Age (4y-5y)> School Age (6y-10y)> Early Adolescent (11y-14y)> Adolescent (15y-19y)> Young Adulthood (20y-39y)> Middle Adulthood (40y-64y)> Older Adulthood (65y+)> Do not know/unable to answer
														How often has client moved where they live in the past year for financial reasons? Never> Rarely> Sometimes> Often> Always> Not Applicable		How often does client’s child/ren qualify for a free lunch program? Never> Rarely> Sometimes> Often> Always> Not Applicable		How often does client have difficulty seeing a mental health provider(i.e.,therapist,counselor) when needed? Never> Rarely> Sometimes> Often> Always> Not Applicable		How often does client have access to safe area(s)to exercise(e.g.,park,waking path,biketrail)? Never> Rarely> Sometimes> Often> Always> Not Applicable		How often does client find it difficult to find a market with available healthy foods? Never> Rarely> Sometimes> Often> Always> Not Applicable				How often does client have reliable transportation (e.g., bus,train,taxi,Zipcar©,Uber©/Lyft©)? Never> Rarely> Sometimes> Often> Always> Not Applicable			How often does client feel stressed on a daily basis? Never> Rarely> Sometimes> Often> Always> Not Applicable				What is client’s identified ethnicity? Hispanic/Latino(a)> Non-Hispanic/Latino(a)> Do not know/unable to answer
														How often does client have trouble making ends meet at the end of the month? Never> Rarely> Sometimes> Often> Always> Not Applicable		How often does client use community support systems (e.g.,mosque,synagogue,church,community group, senior center)? Never> Rarely> Sometimes> Often> Always> NotApplicable		How often does client have daily functioning difficulties due to physical, mental, or emotional condition(s)? Never> Rarely> Sometimes> Often> Always> Not Applicable		How often does client feel safe in neighborhood? Never> Rarely> Sometimes> Often> Always> Not Applicable
														How often is client financially satisfied with their job? Never> Rarely> Sometimes> Often> Always> Not Applicable		How often has client been referred to a Medical-Legal Partnership professional? Never> Rarely> Sometimes> Often> Always> Not Applicable		How often does client have time to exercise? Never> Rarely> Sometimes> Often> Always> Not Applicable		How often is client’s home safe from health hazards (i.e.,lead,air/water pollution,poor electrical wiring/ plumbing,etc.)? Never> Rarely> Sometimes> Often> Always> Not Applicable
														Does client have adequate health insurance? Check off all that apply (a-g)		How often is client able to turn to family and/or friends for help when needed? Never> Rarely> Sometimes> Often> Always> NotApplicable
														Income Status ; <$12,999> $13,000-$24,999> $25,000-$44,999> $45,000-$64,999> $65,000-$84,999> $85,000-$104,999> $105,000–124,999> $125,000-$144,999> ≥$145,000> Do not know/unable to answer		Marital Status Single (never married)> Cohabitating> Married/Partner> Separated/Divorced> Widowed> Do not know/unable to answer
														Employment status: Less than part-time (≤ 20 hours/week)> Part-time (20–39 hours/week)> Full-time (40 hours/week or more)> Do not know/unable to answer
EK	2	Bechtel, 2021	Evaluation of the core 5 social determinants of health screening tool	USA	adult	Clinic patients aged 18+, English speaking	Federally Qualified Health Center (FQHC) in 2019 in a large Midwestern metropolitan city	Core 5 SDH screening checklist	3	The public health nurses established content validity of the Core 5 screening checklist in collaboration with a working group of 17 nurse experts in the SDH	2		2		2		2		1	Are you worried about losing your housing, or are you homeless? Y/N	1	Do you/your family worry about whether your food will run out and you won’t be able to get more? Y/N	1	Are you currently having issues at home with your utilities, such as your heat, electric, natural gas or water? Y/N	1	Has a lack of transportation kept you from attending medical appointments, or from work, or from getting things you need for daily living? Y/N	1	Are you worried that someone may hurt you or your family? Y/N
Ac
EK	3	Beck, 2012	Identifying social risk via a clinical social history embedded in the electronic health record	USA	paediatric	A retrospective electronic health record review of 639 infants seen within the first month of life for well child care encounters	Well child care encounters at an academic and urban hospital-based Pediatric Primary Care Center	N/a (a social history template)	2	The social history template was developed after a review of the literature and in consultation with medical staff, social services, and the medical–legal partnership at the Pediatric Primary Care Center	2		1	Are you doing okay making ends meet? Y/N	1	Are you having problems receiving WIC (womens, infants and children supplemental nutrition program), food stamps, daycare vouchers, health insurance? Y/N	2		1	Problems with housing conditions (overcrowding, evictions, lead, utilities, mould, rodents)? Y/N	1	In the past month, did anyone in your family go hungry because there was not enough money? Y/N	2		2		1	Do you feel that you and/or your children are safe in your relationships? Y/N
EK&AC	4	Berkowitz, 2021	Evaluation of a social determinants of health screening questionnaire and workflow pilot within an adult ambulatory clinic.	USA	adult	Eligible adult patients for screening were limited to those whose visits were classified as “Medicare Wellness”, “Health Maintenance Exam”, “New patient”, or “Transfer of care” in either the Internal Medicine or Family Medicine departments of Sutter Health, a large integrated health network in Northern California	Data collected from Sutter Health’s system-wide Epic EHR platform	N/a (11-question SDOH pilot questionnaire)	4				1	How hard is it for you to pay for the very basics like food, housing, medical care, and heating? Very hard> Hard> Somewhat hard> Not very hard> Not hard at all> Declined to Answer> Don’t know>	1	In a typical week, how many times do you talk on the telephone with family, friends, or neighbors? Never> Once a week> Twice a week> Three times a week> More than three times a week> Declined to Answer									1	Has the lack of transportation kept you from medical appointments or from getting medications? Yes> No> Declined to Answer> Don’t know	1	Within the last year, have you been humiliated or emotionally abused in other ways by your partner or ex-partner? Yes> No> Declined to Answer	Do you feel stress - tense, restless, nervous, or anxious, or unable to sleep at night because your mind is troubled all the time - these days? Not at all> Only a Little> To Some Extent > Rather Much> Very Much> Declined to Answer
AC																How often do you get together with friends or relatives? Never> Once a week> Twice a week> Three times a week> More than three times a week> Decline to Answer												Within the last year, have you been kicked, hit, slapped, or otherwise physically hurt by your partner or ex-partner? Yes> No> Decline to Answer
EK	5	Berry, 2020	Social Needs Screening and Referral Program at a Large US Public Hospital System, 2017	USA	both	28 key informants from the three pilot clinics, including leadership personnel, frontline staff, volunteers, and primary care providers,as well as central leadership	3 ambulatory care clinics at New York City Health + Hospitals (the largest public health care system in the United States): an adult outpatient clinic and a pediatric clinic in Manhattan and an adult outpatient clinic in the South Bronx.	N/a (SDOH screening and referral program)	4	N/a	2		1	I need help with health insurance, medical bills and / or medication costs Y/N	1	I want help with school, learning English, or job training for myself. Y/N	2		1	I am worried about losing my housing in the next 2 months. Y/N	1	Within the past 12 months, I worried whether my food would run out before I had money to buy more. Y/N	1	I have problems with mold, pests, lead, water, electricity or gas in my home. Y/N	2		1	I feel frightened by what my partner says or does. Y/N
														I need help with for Public Assistance (Welfare/TANF), Social Security Income (SSI), or Social Security Disability (SSD). Y/N		I need daycare for my child (or daycare voucher). Y/N				I sleep in places like the subway, bus station, or outside. Y/N
																I want free and confidential help from a lawyer about immigration or other legal problems. Y/N
EK	6	Bittner, 2021	A Broad-Based Approach to Social Needs Screening in a Pediatric Primary Care Network.	USA	child	The Pediatric Physicians’ Organization at Children’s (PPOC) is an independent practice association affiliated with Boston Children’s Hospital. All patients with a PPOC primary care provider were eligible to complete an Health Needs Assessment (HNA) screening	All digitally entered HNA responses and corresponding patient data were extracted from the EHR	Health Needs Assessment (HNA) screening tool	3	THE HNA includes previously (individually) validated questions (from the Health Leads screening toolkit)	2		1	In the last 12 months, was there a time when your child needed to see a doctor or get medications or supplies but could nto because of cost? Y/N	1	Do you feel that you need more support from other people or programs to help youcare for yourself or your family? Y/N	1	In the last 12 monhts, have you or your family ever had to go without health care because you didn't have a way to get there? Y/N	1	Are you worried that in the next 2 months you may not have stable housing?	1	In the last 12 months, did you or your family ever eat less than you felt you should because there wasn't enough money for food? Y/N	1	In the last 12 months, has the electric, gas, oil l or water company threatened to shut off your services in your home? Y/N
														In the last 12 months, was there a time when your child needed to see a doctor or get medications or supplies but could nto because of cost? Y/N				Do you need help understanding your or your child's healthcare needs (diagnosis, medications, plan, etc)? Y/N		Think about the palce you live. Do you have problems with any of the following? Pests (mice or roaches), mould, no/not working smoke detectors, water leaks, no window guards? Y/N							1	Are you or your family worried about feeling safe in your home? Y/N
																		Did you or your child miss school or work because of a health problem that could have been avoided?
EK	7	Bradywood, 2021	Implementing screening for social determinants of health using the Core 5 screening tool.	USA	adult	Potential adult participants included all back pain patients seen in the neurosurgical clinic for a 6- week period of time who progressed to surgery over a 3- month timeframe.	Neurosurgical specialty clinic associated with an urban, 336- bed tertiary- care hospital, located in downtown Seattle, Washington - Virginia Mason Medical Center	Core 5 social risk screening tool	3	This tool, developed by the Columbus Ohio Public Health Department, consists of five questions written at a fifth- grade reading level in patient- friendly language. Pilot studies found consensus in the usability by nursing staff, reported increases in social support referrals for patients, and documented reliability in measurement.	2		2		2		2		1	Are you worried about losing your housing, or are you homeless? Y/N	1	Do you/your family worry about whether your food will run out and you won’t be able to get more? Y/N	1	Are you currently having issues at home with your utilities, such as your heat, electric, natural gas or water? Y/N	1	Has a lack of transportation kept you from attending medical appointments, or from work, or from getting things you need for daily living? Y/N	1	Are you worried that someone may hurt you or your family? Y/N
EK	8	Browne-Yung, 2019	Developing a screening tool to recognise social determinants of health in Australian clinical settings	Australia	adult	Study involved focus groups with consumers (three females and three males recruited from an independent volunteer health consumer group, all of whom had consumer experience of health services and most of whom were retired allied health professionals) and clnicians (including doctors, nurses and psychologists from two clinics: one for anxiety disorder conditions and the other for sleep health.)	N/a	Social Health Screening (SHS) tool	2	The paper outlines a 3-phase development process involving focus groups and interviews	1	What of the following best describes your highest level of education? Tick one box: No formal schooling  Primary school  Secondary school (high, tech etc.)  Tertiary  Other (please specify: ___	1	How would you say you are managing financially at the moment? Tick one box: Living comfortably  Getting by  Finding it difficult 	1	Below is a list of situations in which people might need help (from their friends, family or acquaintances). For each situation, please indicate how many people you COULD ask for help. (Please tick one box for each line) If you wanted to talk about personal problems or needed help making an important decision> If you needed practical help, for example help around the house or wanting a lift somew…			1	How safe do you feel in your home/neighbourhood? Tick one box: Very safe  Somewhat safe  Neither safe nor unsafe  Unsafe  Very unsafe 	1	In the past month, did anyone in your family go hungry because there was not enough money to buy food? Y/N			1	Is it difficult for you to travel to medical appointments? Yes  No  Sometimes 	1	In the last year, have you experienced any emotional, physical or financial abuse? Y/N	Do you use the Internet for health information? Tick one or more boxes: Yes, at the place where I live  Yes, using my mobile phone  Yes, elsewhere  No internet 			1	Where were you born?			1	Are you: Male  Female  Transgender 
														Are you at risk of losing your home? Y/N		Which of the following best describes your living arrangements? Tick one box: Live alone  Live with partner only  Live with partner and children  Sole parent with children  Live with parents/other related adults  Live with unrelated adults  Other, please specify				What type of residence do you live in? Tick one box: House  Flat, unit or apartment  Retirement village  Caravan or mobile home  Housing trust  Supported accommodation  Other, please specify __								Do you feel that you and /or your children are safe in your relationships? Y/N	Do you have caring responsibilities for any of the following: (If no, please go to Question 19) Tick one box: Partner  Child with disability  Other relative  Friend  No caring > If yes, about how long do you usually spend caring for him or her? Tick one box: All of the time  Most of the time  Some of the time  A little of the time 				Do you usually speak a language other than English at home? Y/N What language do you speak? __
														How secure is your current job? Very insecure 1 2 3 4 5 Very secure		How do you feel about your relationships with your relatives and friends? (Tick one box) Extremely satisfied___Extremely dissatisfied													Do you receive any help with your own everyday living activities? Y/N				Are you an Aboriginal or Torres Strait Islander? Y/N
														Are you working? Y/N> Full time employed  Part time/ casual employment> Not Working  Home duties/retired  Student  Unable to work (disability/WorkCover) 															How do you feel about your life in general? Looking at the faces below, which face shows best how you feel about your life as it is now? (Tick one box) Extremely satisfied____Extremely dissatisfied
														How many hours of paid work do you usually do per week? _															Stress means a situation in which a person feels tense, restless, nervous or anxious or is unable to sleep at night because his/her mind is troubled all the time. Do you feel this kind of stress these days? Tick one box: All of the time  Most of the time  Some of the time  A little of the time  None of the time 
EK	9	Chagin, 2021	A Framework for Evaluating Social Determinants of Health Screening and Referrals for Assistance	USA	adult	Patients receiving COVID-19 vaccines at multiple MetroHealth clinical locations in and near Cleveland, Ohio	Screening occurred (1) in-person or by telephone through contact with a care coordinator or other staff person or (2) online through a MyChart patient portal questionnaire triggered by an appointment for a primary care, OB-GYN, or geriatrics visit.	N/a (Social Determinants of Health Questionnaire)	3	The questions were obtained from previously validated surveys			1	How hard is it for you to pay for basics like food, housing, medical care, and heating? ☐ Not at all ☐ Not very hard ☐ Somewhat hard ☐ Hard ☐ Very hard	1	In a typical week, how often do you talk on the phone with family, friends, or neighbors? ☐ Never ☐ Once a week ☐ Twice a week ☐ 3 times a week ☐ More than 3 × week			1	In the last 12 months: Were you unable to pay the rent or mortgage on time? ☐ Yes ☐ No	1	In the last 12 months: Have you worried your food would run out before you had money to buy more? ☐ Never ☐ Sometimes ☐ Often	1	In the last 12 months: Do you have any problems at home with: ☐ Lack of heat ☐ Water leaks ☐ Mold ☐ Pests	1	In the last 12 months, has lack of transportation: Kept you from medical appointments or from getting medications? ☐ Yes ☐ No	1	Within the last 12 months, have you been: Afraid of your partner or ex-partner? ☐ Yes ☐ No	Sress: How often do you feel stress these days (tense, restless, nervous, anxious, or trouble sleeping)? ☐ Not at all ☐ Only a little ☐ To some extent ☐ Rather much ☐ Very Much
																How often do you get together with friends or relatives? ☐ Never ☐ Once a week ☐ Twice a week ☐ 3 times a week ☐ More than 3 × week				In the last 12 months: Did you not have a steady place to sleep, or sleep in a shelter? ☐ Yes ☐ No		In the last 12 months: Did the food you bought just not last and you didn’t have money to buy more? ☐ Never ☐ Sometimes ☐ Often		In the last 12 months: ☐ Lead paint or pipes ☐ Oven/stove not working ☐ Smoke detectors not working ☐ None		In the last 12 months, has lack of trasportation: kept you from meetings, work, or getting things needed for daily living? ☐ Yes ☐ No		Within the last 12 months, have you been: Humiliated or emotionally abused by your partner or ex-partner? ☐ Yes ☐ No	Digital connectivity: Do you currently have internet access at home? ☐ Yes ☐No
																How often do you attend church or religious services? ☐ Never ☐ 1 to 4 times per year ☐ more than 4 times per year				In the last 12 months: How many places have you lived?				In the last 12 months, has the electric, gas, oil, or water company threatened to shut off your services? ☐ Yes ☐ No ☐ Currently shut off				Within the last 12 months, have you been: Kicked, hit, slapped, or otherwise physically hurt by your partner or ex-partner? ☐ Yes ☐ No	Digital connectivity: Do you have internet access on a device or in another location? ☐ Yes ☐ No. If Yes, where? ☐ On a cell phone ☐ At work ☐ Other (Library) ☐ Multiple access options
																Do you belong to any clubs or organizations (such as church groups, unions, fraternal, athletic, or school)? ☐ Yes ☐ No How often do you attend meetings of the clubs or organizations you belong to? ☐ Never ☐ 1 to 4 times per year ☐ more than 4 times per year												Within the last 12 months, have you been: Forced to have any kind of sexual activity by your partner or ex-partner? ☐ Yes ☐ No
																Are you currently: ☐ Married ☐ Widowed ☐ Divorced ☐ Separated ☐ Never married ☐ Living with partner
EK	10	Ciccolo, 2020	Improving Understanding of Screening Questions for Social Risk and Social Need Among Emergency Department Patients	USA	paediatric	English and Spanish speaking adult patients and parents of paediatric patients with adequate or limited health literacy attending the ED.	A large, urban Emergency Department	Tool adapted from the AHC (Accountable Health Communities) screening tool	2	The goal of this study was to develop and optimize a social risk and social need screening tool for ED patients									1	In the last month, have you had concerns about the condition or quality of your housing? Y/N	1	In the past 12 months, have you worried that your food would run out before you got money to buy more? Response Options:“Yes, Often/Sometimes”>“No, Never” (binary option)	1	In the past 12 months, have you worried that any utility (electric, gas, water or oil) would be shut off for not paying your bills? Y/N	1	How often is it difficult to get transportation to or from your medical or follow-up appointments? Response Options: “Always/often”>“Sometimes/Never”
																				Are you worried that in the next month, you may not have stable housing? Y/N		In the past 12 months, has your food run out and you didn’t have money to get more? Response Options:“Yes, Often/Sometimes”>“No, Never”		Would you like resources to help with paying for your utility bills? Y/N		Would you like resources to help with transportation? Y/N
																				Would you like resources to help with housing? Y/N		Would you like resources to help with obtaining food? Y/N
EK	11	David, 2021	Social Determinants of Health Screening at Well Child Visits: A Pilot Program Implemented During the COVID-19 Pandemic	USA	paediatric	Families of children 1-17 years who presented for in-person well child visits at a paediatric clinic. The clinic serves an ethnically diverse patient population with a large portion of the families on public assistance.	Retrospective chart review at a single suburban academic paediatric clinic	N/a (a SDH screening and referral protocol). Tool available in English and Spanish	4	N/a			1	How hard is it for you to pay for the very basics like food, housing, medical care, and heating? Not hard at all > Not very hard > Somewhat hard > Hard > Very hard > Prefer Not to Answer							1	Within the past 12 months, you worried that your food would run out before you got money to buy more: Never True > Sometimes True > Often True > Prefer Not to Answer			1	In the past 12 months, has lack of transportation kept you from medical appointments or from getting medications? Yes > No > Prefer Not to Answer
																						Within the past 12 months, the food you bought just did not last and you did not have money to get more: Never True > Sometimes True > Often True > Prefer Not to Answer				In the past 12 months, has lack of transportation kept you from meetings, work, or getting things needed for daily living? Yes > No > Prefer Not to Answer
EK	12	De Marchis, 2019	Part I: A Quantitative Study of Social Risk Screening Acceptability in Patients and Caregivers	USA	paediatric	Patients and adult caregivers of pediatric patients attending healthcare settings that served a minimum of 30% publicly insured or uninsured patients	Primary care and emergency department (ED) settings. The final sample was drawn from 9 states and included 4 family medicine clinics, 2 internal medicine clinics, 2 general EDs, and 2 pediatric EDs. Of the primary care sites, 2 were rural practices, 1 was an urban community clinic, and 3 were part of urban academic health centers. All 4 EDs were based in urban academic health centers.	AHC (Accountable Health Communities) social risk screening tool	4 (referred to as validated in another paper)	N/a			1	In the past 12 months, was there a time when you were not able to pay the mortgage or rent on time? a) Yes b) No					1	What is your housing situation today? a) I have a steady place to live b) I have a place to live today, but I am worried about losing it in the future c) I do not have a steady place to live (I am temporarily staying with others, in a hotel, in a shelter, living outside on the street, on a beach, in a car, abandoned building, bus or train station, or in a park) d) I prefer not to answer*	1	Within the past 12 months, you worried that your food would run out before you got money to buy more. a) Often true b) Sometimes true c) Never true d) I prefer not to answer	1	In the past 12 months has the electric, gas, oil, or water company threatened to shut off services in your home? a) Yes b) No c) Already shut off d) I prefer not to answer	1	In the past 12 months, has lack of reliable transportation kept you from medical appointments, meetings, work or from getting things needed for daily living? a) Yes b) No c) I prefer not to answer	1	How often does anyone, including family and friends, physically hurt you? a) Never b) Rarely c) Sometimes d) Fairly often e) Frequently f) I prefer not to answer				1	What is your race? (mark all that apply) (*not part of SDH screening tool) a) White b) Black or African American c) American Indian or Alaska Native d) Asian Indian e) Chinese f) Filipino g) Japanese h) Korean i) Vietnamese j) Native Hawaiian k) Guamanian or Chamorro l) Samoan m) Other Pacific Islander (specify) ____________ n) Other Asian (specify)______________ o) Some other race (specify) ____…			1	How do you describe your gender? (*not part of SDH screening tool) a) Male b) Female c) Trans male/Trans man d) Trans female/Trans woman e) Gender-queer/Gender non-conforming f) Different identity g) Prefer not to answer
																				Think about the place you live. Do you have problems with any of the following? (Check all that apply) a) Pests such as bugs, ants, or mice b) Mold c) Lead paint or pipes d) Lack of heat e) Oven or stove not working f) Smoke detectors missing or not working g) Water leaks h) None of the above i) I prefer not to answer		Within the past 12 months, the food you bought just didn’t last and you didn’t have money to get more. a) Often true b) Sometimes true c) Never true d) I prefer not to answer						How often does anyone, including family and friends, insult or talk down to you? a) Never b) Rarely c) Sometimes d) Fairly often e) Frequently f) I prefer not to answer					Are you of Hispanic or Latino origin? (*not part of SDH screening tool) a) No, not Hispanic, Latino or Spanish origin b) Yes, Mexican, Mexican American, Chicano c) Yes, Puerto Rican d) Yes, Cuban e) Yes, another Hispanic, Latino, or Spanish origin
																				In the past 12 months, how many times have you moved where you were living? (drop down) (Answer is # of moves. Positive screen if answer is 2 or more moves in the last 12 months)								How often does anyone, including family and friends, threaten you with harm? a) Never b) Rarely c) Sometimes d) Fairly often e) Frequently f) I prefer not to answer
																				At any time in the past 12 months, were you homeless or living in shelter (including now)? a) Yes b) No								How often does anyone, including family and friends, scream or curse at you? a) Never b) Rarely c) Sometimes d) Fairly often e) Frequently f) I prefer not to answer
EK	13	Friebott, 2021	Toward Successful and Sustainable Statewide Screening for Social Determinants of Health: Testing the Interest of Hospitals	USA	adult	Qualitative interviews with staff from pilot hospitals were conducted. All 8 staff members who conducted the screening using the CSHI assessment tool were contacted for in-depth interviews. Five staff (5 of 8) from the 4 hospitals completed an electronic survey	Four of the 27 hospital members of Connecticut Hospital Association agreed to participate. Of the 4 hospitals, 1 was located in a rural setting and 3 were in urban settings.	The modified PRAPARE tool, called the Connecticut social health initiative assessement tool (CSHI) Assessment Tool	2	N/a ("no validation process for the screening procedures")	1	How long did you go to school? I did not finish high school > I finished high school or have a GED > I finished more than high school > I do not want to answer	1	What do you do for work? Not working > Part time or temporary work > Full-time work > Not enough work or too little pay > Not looking for work (why, please write):__ > I do not want to answer	1	How often do you talk to your friends or family, either in person or on the phone? Less than once a wee > 1 or 2 times a week > 3 to 5 times a week > % or more times a week > I do not want to answer	1		1	Do you have a place to live today? I have a place to live > I am worried about a place to live > I do not have a place to live > I do not want to answer	1	In the past year, what did you or your family go without? (check all that apply) Food > Heat/Lights/Water > Medication(s) > Health Care (like medical, dental, vision) > Other (please write) > I do not want to answer	1	In the past year, what did you or your family go without? (check all that apply) Food > Heat/Lights/Water > Medication(s) > Health Care (like medical, dental, vision) > Other (please write) > I do not want to answer	1	Has lack of transportation stopped you from getting to the doctor, to work, or getting things you need every day? (check all that apply) Yes (please write) > No > I do not want to answer						1	What language are you most comfortable speaking? English > Other than English (please write):___ > I do not want to answer
																																	Which race(s) are you? (check all that apply): Asian > Pacific Islander > White > Native Hawaiian > Black/African American > American Indian/Alaskan Native > Other (please write):___ > I do not want to answer
																																	Are you Hispanic or Latino? Yes > No > I do not want to answer
EK	14	Friedman, 2021	Improving Screening for Social Determinants of Health in a Pediatric Resident Clinic: A Quality Improvement Initiative	USA	paediatric	The quality improvement team consisted of seven pediatric faculty and 19 pediatric residents working in collaboration with nurses, medical assistants, registration staff, social work, mental health providers, and practice leadership	urban primary care, community-based, hospital-affiliated practice in New York City. The majority(71%) of the patient population in the neighborhood is Hispanic, and 48% of the patient population are immigrants, two-thirds from the Dominican Republic. More than one-quarter of the families in this neighborhoodhave household incomes below the federal poverty level.	N/a (Questions focused on SDOH were drawn from the American Academy of Pediatrics and The Joint Commission guidelines)	2	N/a									1	Any recent changes in the home?Y/N/If yes, please describe							1	Have you ever feared being the victim of violence in your home? Y/N/If yes, please describe
																				Any guns or weapons in the home? Y/N/If yes, please describe
																				Any peeling paint in the home? Y/N/If yes, please describe
																				Do you have functioning smoke detectors? Y/N/If yes, please describe
																				Do you have functioning carbon monoxide detectors? Y/N/If yes, please describe
																				Do you have window guards? Y/N/If yes, please describe
																				Does anyone who lives at home smoke? Y/N/If yes, please describe
EK	15	Gottlieb, 2014	A Randomized Trial on Screening for Social Determinants of Health: the iScreen Study	USA	paediatric	Participants were drawn from adult caregivers seeking treatment of a child in a fast-track arm of a large, urban children’s hospital ED in Oakland, CA. Seventy percent of patients have Medicaid insurance; 33% of patients are African American and 42% Latino.	Large urban Children's Hospital in California	Iscreen	3	Some items based on existing validated surveys		How stressful do you find concerns about your child not getting the services he or she is supposed to get to learn? ❍ 1. Not at all stressful. ❍ 2. A little bit stressful. ❍ 3. Moderately stressful. ❍ 4. Very stressful. ❍ 5. Extremely stressful. ❍ 6. Issue listed is not relevant to my family.	1	How stressful do you find concerns about not having enough money at the end of the month? ❍ 1. Not at all stressful. ❍ 2. A little bit stressful. ❍ 3. Moderately stressful. ❍ 4. Very stressful. ❍ 5. Extremely stressful. ❍ 6. Issue listed is not relevant to my family.	1	How stressful do you find concerns about finding activities for your child during the summer/after school? ❍ 1. Not at all stressful. ❍ 2. A little bit stressful. ❍ 3. Moderately stressful. ❍ 4. Very stressful. ❍ 5. Extremely stressful. ❍ 6. Issue listed is not relevant to my family.	1	How stressful do you find concerns about lack of health insurance or inadequate insurance? ❍ 1. Not at all stressful. ❍ 2. A little bit stressful. ❍ 3. Moderately stressful. ❍ 4. Very stressful. ❍ 5. Extremely stressful. ❍ 6. Issue listed is not relevant to my family.	1	How stressful do you find concerns about your child’s exposure to tobacco smoke? ❍ 1. Not at all stressful. ❍ 2. A little bit stressful. ❍ 3. Moderately stressful. ❍ 4. Very stressful. ❍ 5. Extremely stressful. ❍ 6. Issue listed is not relevant to my family.	1	How stressful do you find concerns that food will run out before you get money or food stamps to get more? ❍ 1. Not at all stressful. ❍ 2. A little bit stressful. ❍ 3. Moderately stressful. ❍ 4. Very stressful. ❍ 5. Extremely stressful. ❍ 6. Issue listed is not relevant to my family			1	How stressful do you find concerns about affording transportation or getting around? ❍ 1. Not at all stressful. ❍ 2. A little bit stressful. ❍ 3. Moderately stressful. ❍ 4. Very stressful. ❍ 5. Extremely stressful. ❍ 6. Issue listed is not relevant to my family.	1	How stressful do you find concerns about threats to your child’s safety at school or in the neighborhood? ❍ 1. Not at all stressful. ❍ 2. A little bit stressful. ❍ 3. Moderately stressful. ❍ 4. Very stressful. ❍ 5. Extremely stressful. ❍ 6. Issue listed is not relevant to my family	How stressful do you find concerns about the use of drugs or alcohol by yourself or family members? ❍ 1. Not at all stressful. ❍ 2. A little bit stressful. ❍ 3. Moderately stressful. ❍ 4. Very stressful. ❍ 5. Extremely stressful. ❍ 6. Issue listed is not relevant to my family
														How stressful do you find concerns about difficulties finding or keeping a job? ❍ 1. Not at all stressful. ❍ 2. A little bit stressful. ❍ 3. Moderately stressful. ❍ 4. Very stressful. ❍ 5. Extremely stressful. ❍ 6. Issue listed is not relevant to my family		How stressful do you find concerns about the difficulty of getting benefits and services for yourself or your family (such as Supplemental Nutrition Program for Women, Infants, nd Children, food stamps/CalFresh, school meals, welfare/CalWorks, social security, unemployment, disability, general assistance, In Home Support Services, etc)? ❍ 1. Not at all stressful. ❍ 2. A little bit stressful. ❍ 3.…		How stressful do you find concerns about getting health care (visits, medications) when your child needs it? ❍ 1. Not at all stressful. ❍ 2. A little bit stressful. ❍ 3. Moderately stressful. ❍ 4. Very stressful. ❍ 5. Extremely stressful. ❍ 6. Issue listed is not relevant to my family.		How stressful do you find concerns about the physical condition of your housing (for instance, problems with mold, roaches, mice, cold)? ❍ 1. Not at all stressful. ❍ 2. A little bit stressful. ❍ 3. Moderately stressful. ❍ 4. Very stressful. ❍ 5. Extremely stressful. ❍ 6. Issue listed is not relevant to my family.		How stressful do you find concerns about not having enough healthy food (fruits, vegetables, and whole grains) to eat every day? ❍ 1. Not at all stressful. ❍ 2. A little bit stressful. ❍ 3. Moderately stressful. ❍ 4. Very stressful. ❍ 5. Extremely stressful. ❍ 6. Issue listed is not relevant to my family.						How stressful do you find concerns about adults in the home who are physically violent or threaten your child’s, your, or another family member’s safety at home? ❍ 1. Not at all stressful. ❍ 2. A little bit stressful. ❍ 3. Moderately stressful. ❍ 4. Very stressful. ❍ 5. Extremely stressful. ❍ 6. Issue listed is not relevant to my family.	How stressful do you find concerns about past or current incarceration of >/= 1 of your child’s household members? ❍ 1. Not at all stressful. ❍ 2. A little bit stressful. ❍ 3. Moderately stressful. ❍ 4. Very stressful. ❍ 5. Extremely stressful. ❍ 6. Issue listed is not relevant to my family.
																How stressful do you find concerns about finding affordable and reliable child care? ❍ 1. Not at all stressful. ❍ 2. A little bit stressful. ❍ 3. Moderately stressful. ❍ 4. Very stressful. ❍ 5. Extremely stressful. ❍ 6. Issue listed is not relevant to my family.		How stressful do you find concerns about dealing with your child’s behavioral or mental health problems? ❍ 1. Not at all stressful. ❍ 2. A little bit stressful. ❍ 3. Moderately stressful. ❍ 4. Very stressful. ❍ 5. Extremely stressful. ❍ 6. Issue listed is not relevant to my family.		How stressful do you find concerns about the cost or stability of your housing (for instance, lived at more than one address in the past 6 months, with family/relatives who help to pay rent, lived in transitional housing or a shelter, lived on the street or in a car)? ❍ 1. Not at all stressful. ❍ 2. A little bit stressful. ❍ 3. Moderately stressful. ❍ 4. Very stressful. ❍ 5. Extremely stressful. …									How stressful do you find concerns about problems with child support or custody? ❍ 1. Not at all stressful. ❍ 2. A little bit stressful. ❍ 3. Moderately stressful. ❍ 4. Very stressful. ❍ 5. Extremely stressful. ❍ 6. Issue listed is not relevant to my family.
																		How stressful do you find concerns about dealing with your own mental health or mental health care? ❍ 1. Not at all stressful. ❍ 2. A little bit stressful. ❍ 3. Moderately stressful. ❍ 4. Very stressful. ❍ 5. Extremely stressful. ❍ 6. Issue listed is not relevant to my family.											How stressful do you find concerns about a family member’s immigration status? ❍ 1. Not at all stressful. ❍ 2. A little bit stressful ❍ 3. Moderately stressful. ❍ 4. Very stressful. ❍ 5. Extremely stressful. ❍ 6. Issue listed is not relevant to my family.
																		How stressful do you find concerns about your child getting enough physical activity (at least 60 minutes a day)? ❍ 1. Not at all stressful. ❍ 2. A little bit stressful ❍ 3. Moderately stressful. ❍ 4. Very stressful. ❍ 5. Extremely stressful. ❍ 6. Issue listed is not relevant to my family.
EK	16	Kausar	Clinically Screening Hospital Patients for Social Risk Factors Across Multiple Hospitals: Results and Implications for Intervention Development	USA	adult	The study population consisted of all patients admitted to one of the 12 hospitals who had at least one social risk factor documented, from June 25, 2019, to January 24, 2020, except for patients admitted to maternity/pediatrics.	12 Northwell Health hospitals in the New York City/Long Island (NYC-LI) metropolitan area.	N/a (Social risk factor screening module)	3	An interdisciplinary committee consisting of physicians, nurses, dietitians, social services, case management, administration, and members of academic affairs and hospital/system administration developed Northwell’s social risk factor screening module. The committee considered best practices, validated survey questions, and the communities in which Northwell serves while developing questions.	1	Do you ever need help understanding what your doctor tells you, or help reading health information?	1	Do you have trouble paying your bills? Y/N	1	Do you need help getting public benefits such as food stamps, WIC, welfare, disability income, other? Y/N	1	Do you need help getting dental or health insurance? Y/N	1	Do you worry that in the next two months you/your family may not have a safe place to live? Y/N	1	Do you worry that you will run out of food before you get money to buy more? Y/N			1	Do problems with transportation stop you from getting to doctor visits or getting your medication? Y/N	1	Do you feel unsafe at home/work/school? Y/N
														Do you need help finding a job? Y/N		Do you need help from a lawyer with the following: housing, immigration, custody, child support, other? Y/N		Do you ever skip medications that you need, or going to the doctor, to save money? Y/N		Do you worry that the place you are living is making you sick? Y/N								Do you feel threatened by others? Y/N
														Do you/family member need any of the following: clothing, diapers, car seats, school supplies, other? Y/N														Have you experienced violence? Y/N
EK	17	Macias-Konstantopoulos, 2022	A pilot mixed-methods randomized controlled trial of verbal versus electronic screening for adverse social determinants of health	USA	mixed	ED patients (or parents/legal guardians of pediatric-age patients) were eligible for study inclusion if they were English- or Spanish-speaking,≥18 years old, and able to consent	ED of a large urban academic medical center	N/a	4	The tool was developed for the primary care setting by the health system in which the study was conducted (available in English and Spanish)	1	Are you interested in more education? Y > N > Decline to answer	1	Are you currently unemployed and looking for work? Y > N > Decline to answer	1	Do you have trouble with childcare or the care of a family member? Y > N > Decline to answer	1	Do you have trouble paying for medicines? Y > N > Decline to answer	1	What is your housing situation today? I do not have housing > I have housing > Decline to answer	1	Within the past 12months we worried whether our food would run out before we got money to buy more. Never true > Sometimes/often true	1	Do you have trouble paying your heating or electricity bill? Y > N > Decline to answer		Has lack of transportation kept you from medical appointments or from getting medications? Y/N			Would you like information today about any of the following topics: None > At least 1 > Transportation > Paying utility bills > Education > Food > Paying formedications > Childcare > Housing > Job search or training > Care for elder or disabled
																In the last 12months, have you received assistance from an organization or programto help you with any of the following? None > At least 1 > Transportation > Paying utility bills > Education > Food > Paying formedications > Childcare > Housing > Job search or training > Care for elder or disabled				How many times have you moved in the past 12 months? 2+ times > 0–1 time 1 > Missing/decline to answer		Within the past 12 months the food we bought just didn’t last and we didn’t have money to get more. Never true > Sometimes/often true
																				Are you worried that in the next 2months, you may not have your own housing to live in? Y > N > Decline to answer
EK	18	Mayo, 2021	Social needs screening during the COVID-19 pandemic	USA	paediatric	The study population consisted of families of children receiving care at the paediatrics clinic in the prior year living in the four postal ZIP codes closest in location to the clinic. Children in the sample predominantly identify as Black or African American (90%) and 91% were insured with public insurance (Medicaid).	Pediatric outpatient practice in Baltimore, Maryland.	Questions on this screening tool were adapted from the Safe Environment for Every Kid (SEEK) Parent Questionnaire-R and reviewed by a child abuse specialist	3	The study screening tool was adapted from a validated screening tool (the SEEK questionnaire) and was reviewed by an expert in the field,	1	Do you feel like your child is not able to do his/her assigned school work?	1	If child in diapers - Have you had trouble getting diapers or baby wipes? Y/N	1	Have you felt like you needed more help with parenting? Y/N			1	Have you had trouble with housing for your family? Y/N	1	During the COVID pandemic, have you worried that your food would run out before you could buy more? Y/N					1	Have you felt that you or your children are unsafe? Y/N
																						During the COVID pandemic, has the food you bough just not lasted and you didn't have enough money to get more? Y/N
																						If child taking formula - Have you worried that you will not have enough formula for your baby? Y/N
																						If child taking formula - Have you changed the way you are mixing the formula you do have? Y/N
EK	19	Power-Hays, 2020	Universal screening for social determinants of health in pediatric sickle cell disease: A quality-improvement initiative	USA	paediatric	Universal screening for SDoH was introduced into the pediatric hematology clinic. The screening tool was initially offered once every 3 months at nonsick visits and distributed by the physician or social worker. The screening was offered in English, Spanish, and Haitian Creole, and in instances of low literacy, clinic staff read the screener to families. Families were given the option to decline …	Paediatric hematology clinic at Boston Medical Center, an academic, urban, safety net hospital. Seventy-two percent of the hospital’s patients have public health insurance.	WECARE (based on the Well Child Care, Evaluation, Community Resources, Advocacy, Referral, Education system)	1	Previously validated in BMC’s pediatric primary care network	1	Are you interested inmore education? Y/N	1	Are you currently unemployed and looking for a job? Y/N	1	Do you have trouble taking care of a child, family member, or friend? Y/N	1	Do you have trouble paying for medicines? Y/N	1	Do you currently live in a shelter or have no steady place to sleep at night? Y/N	1	Within the past 12months, the food you bought didn’t last and you didn’t have money to get more. Often true/sometimes true/never true	1	Do you have trouble paying your heating or electricity bill? Y/N	1	Do you have trouble getting transportation to medical appointments? Y/N
																Would you like help connecting to resources? Please circle: Housing/shelter, Food, Paying for medication, Transportation to medical appointments, Utilities, Daycare, Job search/training, Education				Do you think you are at risk of becoming homeless? Y/N		Within the past 12months, you worriedwhether your food would run out before you got money to buy more. Often true/sometimes true/never true		If yes, are you at risk of having your utilities shut off in the next week? Y/N
EK	20	Ray, 2020	Nonresponse to Health-Related Social Needs Screening Questions	USA	paediatric	Survey administered to caregivers of children presenting to an academic pediatric ED between February 2019 and June 2019. Caregivers were eligible if they accompanied a child aged 5 years or younger who received a low-acuity triage score (level 4 or 5) during weekday business hours. We selected young children presenting with nonurgent ED visits because of previous literature revealing high levels…	Paediatric ED	We synthesized items inquiring about health-related social needs from multiple existing measures (WECARE [well-child care visit, evaluation, community resources, advocacy, referral, education] and PRAPARE [Protocol for Responding to and Assessing Patients’ Assets, Risks, and Experiences]. We assessed social support with questions from the Medical Outcomes Study social support survey.	3	Items from previously validated tools	1	What is the highest level of education you completed? ∘ Less than high school/GED ∘ High school/GED ∘ Some college ∘ Completed college or additional postcollege education	1	In the past year, have you or your child been unable to get any of the following when it was really needed? Choose all that apply ∘ I have been unable to get needed utilities (for example: gas, electric, water) ∘ I have been unable to get needed phone service ∘ I have been unable to get needed health care (for example: medical, dental, mental health, or vision) ∘ I have been unable to get needed …	1	Do you need daycare for your child? ∘ Yes ∘ No ∘ I choose not to answer this question	1		1	Do you think you are at risk for becoming homeless? ∘ Yes ∘ No ∘ I choose not to answer this question	1	Do you need help in getting food by the end of the month? ∘ Yes ∘ No ∘ I choose not to answer this question	1		1	Has lack of transportation kept you from medical appointments, meetings, work, or from getting things needed for daily living? Check all that apply. ∘ Yes, transportation kept me from medical appointments or from getting medications for myself or my child ∘ Yes, transportation kept me from nonmedical meetings, appointment, work, or from getting things that I need ∘ No ∘ I choose not to answer thi…						1	How do you identify your ethnicity? ∘ Hispanic or Latino/a/x ∘ Not Hispanic or Latino/a/x ∘ Prefer not to say
																Do you have one or more adults in your life that you could count on to help with daily chores if you were sick and needed help? ∘ Yes ∘ No																	How do you identify your race? ∘ African American or Black ∘ Asian ∘ White ∘ Other: ____ o Prefer not to say
																Do you have one or more adults in your life that you could turn to for suggestions about how to deal with a personal problem? ∘ Yes ∘ No
EK	21	Rhinehart, 2021	Integrating a Social Determinants of Health Screener at an Outpatient Pediatric Clinic in East Harlem, New York City	USA	paediatric	The clinic serves a diverse pediatric population (age 0– 21 years) that is 51% Hispanic, 40% African American, and 9% mixed race/ other race (internal data.) Most patients (90%) are insured by Medicaid.	A Paediatric Outpatient clinic in New York City.	N/a ("the screener"). Adapted from varied questionnaires	3	Screening questions were developed with input from faculty and staff in the Departments of Pediatrics, Environmental Medicine and Public Health, and Population Health Science and Policy. Many questions were adapted from SDH screening tools currently used in the United States, including HealthLeads and Hager’s two- question food insecurity survey (Hunger Vital Signs). Focus groups were conducted w…	1	Do you have concerns about your child’s learning or school performance?					1	In the last 6 months, was there a time when you or someone in your household needed to see a doctor but could not because of cost or problems with insurance like Medicaid?	1	Think about where you live, do you have any of these common problems? (check all that apply) Water Leaks, Mold, Roaches, Mice, Rats	1	Within the past 12 months we worried whether our food would run out before we got money to buy more. Y/N
												Do you have concerns about your reading or literacy skills?								Does anyone who lives in your home or who cares for your child smoke tobacco? Y/N		Within the past 12 months the food we bought just didn’t last and we didn’t have money to buy more. Y/N
																				Do you and your child ever smell tobacco smoke in your home that drifts in from a neighbor?
																				Are you worried that in the next 2 months, you may not have stable housing?
EK	22	Sokol, 2021	When Families Do Not Request Help: Assessing a Social Determinants of Health Screening Tool in Practice	USA	paediatric	Data came from records of outpatient pediatric patients. Before a health maintenance pediatric examination, parents completed an SDH screening tool (Table 1) that assessed various social needs and if the parent would like to be contacted for help addressing any of the indicated needs. In some clinics, if the patient was aged ≥ 11 years, the patient completed the screening tool	Pediatric ambulatory care sites within the Midwestern state in urban and suburban settings	N/a ("SDH screening tool")	3	Questions to assess food insecurity were validated items (Hager et al., 2010).Questions to assess housing insecurity, utility insecurity, financial strain, transportation needs, employment needs, elder or child care needs, and literacy needs were adapted from prior tools, including the Protocol for Responding to and Assessing Patients’ Assets, Risks, and Experiences assessment tool developed by t…	1	Do you have someone help you to read instructions or other material from your doctor or pharmacy? Y/N	1	In the last 4 weeks, have you been looking for work? Y/N	1	Do you need help finding a local career center and/or job training?	1	In the last 12 months, did you not see a doctor or skip medications to save money? Y/N	1	In the next 2 months, are you worried that you may not have stable housing? Y/N	1	Within the past 12 months, you worried that your food would run out before you got money to buy more. Y/N	1	In the last 12 months, has the utility company shut off your service for not paying bills? Y/N	1	In the past 12 months, has a lack of transportation kept you from meetings, work, or getting things needed for daily living? Y/N			Do you want to be contacted by the assistance program for help on any of your responses? Y/N
																In the last 4 weeks, did getting elder or child care make it difficult to work or study? Y/N						Within the past 12 months, the food you bought just did not last, and you did not have money to get more. Y/N
																						Within the past 12 months, we worried whether our food would run out before we got money to buy more. Y/N
EK	23	Sundar, 2018	Universal Screening for Social Needs in a Primary Care Clinic: A Quality Improvement Approach Using the Your Current Life Situation Survey	USA	mixed	The author conducted a rapid stakeholder analysis through informal conversations to identify the most important concerns with implementing universal screening. Median household income is $54,546, and about 17% of the population lives below the poverty line. The racial makeup of the city (served by the clinc) is 63.5% white (52% non-Hispanic white), 10.9% Asian, 7.6% two or more races, 6.4% Africa…	Primary care clinic in Burien, WA - a suburban community (population 50,000)	YCLS. Kaiser Permanente’s (KP) Care Management Institute (CMI) created a social needs screening tool, Your Current Life Situation	3	not validated for primary care	1	How often do you need to have someone help you when you read instructions, pamphlets, or other written material from your doctor or pharmacy? Never / Rarely / Sometimes / Often / Always	1	In the past 3 months, did you have trouble paying for any of the following? (Select ALL that apply) Food / Housing / Heat and electricity / Medical needs / Transportation / Childcare / Debts / Other / None of these	1	If for any reason you need help with activities of daily living such as bathing, preparing meals, shopping, managing finances, etc., do you get the help that you need? - I don’t need any help - I get all the help I need - I could use a little more help - I need a lot more help	1	How hard is it for you to get your medications and medical supplies when you need them? - Not at all hard / Somewhat hard / Very hard	1	Which of the following best describes your current living situation? (Select ONE only) - Live alone in my own home (house, apartment, condo, trailer, etc.); may have a pet - Live in a household with other people - Live in a residential facility where meals and household help are routinely provided by paid staff (or could be if requested) - Live in a facility such as a nursing home which provides …	1	In the past 3 months, how often have you worried that your food would run out before you had money to buy more? Never / Sometimes / Often / Very often	1		1	Has lack of transportation kept you from medical appointments or from doing things needed for daily living? (Select ALL that apply) - Kept me from medical appointments or from getting medications - Kept me from doing things needed for daily living - Not a problem for me	1	In the past 12 months, have you been physically or emotionally hurt or felt threatened by a current or former spouse/partner, a caregiver, or someone else you know? - Yes (Current spouse/partner , Former spouse/partner , Caregiver , Someone else) - No	Which, if any, of the following would you like to receive help with at this time? (Select ALL that apply) - Food - Housing - More help with activities of daily living - Childcare/other child-related issues - Transportation - Utilities (heat, electricity, water, etc.) - Medical care, medicine, medical supplies - Dental services - Vision services - Applying for public benefits (WIC, SSI, SNAP, etc.…
												What was the highest grade or level of school that you have completed? (Select ONE only) - 8th grade or less - Some high school, but did not graduate - High school graduate or GED - Some college or Associates degree - Bachelor’s degree (B.A., B.S., etc.) - Graduate/professional degree (MA, PhD, MD,etc.)				Do you have someone you could call if you needed help? Yes / No		When did you last have your teeth cleaned and checked by a dentist or dental hygienist? - Less than 7 months ago / 7-12 months ago / More than 1 year ago / Never had this done		Do you have any concerns about your current living situation, like housing conditions, safety, and costs? - Yes (Condition of housing / Lack of more permanent housing / Ability to pay for housing or utilities / Feeling safe / Other) - No		Are you easily able to get enough healthy food to eat? Yes / No						Has a spouse/partner, family member, or friend ever been financially abusive towards you? That is, stolen money from you, not paid back a loan, etc.? Yes / No	Caregiver responsibilities: Are you a primary caregiver for a child under the age of 18 or for someone who is frail, chronically ill, or has a physical or mental disability? (Select ALL that apply) - Yes, 1+ child(ren) / Yes, someone who is frail, ill, or has a disability / No
																How often do you see or talk to people that you care about and feel close to? (For example, talking to friends on the phone, visiting friends or family, going to church or club meetings) - Less than once a week / 1-2 days a week / 3-4 days a week / 5 or more days a week													During the past month, how much stress would you say you have experienced? - A lot of stress / A moderate amount of stress / Relatively little stress / Almost no stress at all
																Loneliness/Social Isolation: How often do you feel lonely or isolated from those around you? - Never / Rarely / Sometimes / Often / Always													How confident are you that you can manage your current medical conditions day-to-day? - Very confident / Somewhat confident / Not confident
																What is your current marital/relationship status? (Select ONE only) - Married/domestic partner £ Living with a partner in a committed relationship - In a serious or committed relationship, but not living together - Single / Separated / Divorced / Widowed													In general, would you say your health is: - Excellent / Very good / Good / Fair / Poor
																													Do any of your health conditions interfere with your daily activities? Yes / No
AC	24	Tedford, 2022	Social Needs Screening During Pediatric Emergency Department Visits: Disparities in Unmet Social Needs	USA	paediatric	English- and Spanish-speaking caregivers of patients <18-years-old presenting to a free-standing children’s hospital in Salt Lake City, Utah	children’s hospital in Salt Lake City, Utah	the pediatric version of the Screener for Intensifying Community Referrals for Health (p-SINCERE)	2	adapted the validated Screener for Intensifying Community Referrals for Health (SINCERE)31 to our pediatric population as the pediatric- SINCERE (p-SINCERE). The adjustments of the SIN- CERE tool entailed including child-inclusive language to the 10-items; however, no structural changes to the ver- biage were made as the p-SINCERE tool was still admin- istered to the adult caregivers.			1	Have you not had enough money for household items like clothing or furniture? (yes, no, decline to answer)			1	Have you or your child not seen a doctor because there wasn’t a way to get to the clinic or hospital? (yes, no decline to answer)	1	Have you been unable to pay your mortgage or rent? (yes, no, decline to answer)	1	Have you or your children not had enough money for food? (yes, no, decline to answer)	1	Have you been unable to pay your utility bills? (yes, no, decline to answer)
														Have you been unemployed and looking for work? (yes, no, decline to answer)				Have you or your child needed to see a doctor but could not because it costs too much? (yes, no , decline to answer)		Have you or your child slept outside in a shelter, in a car, or any place not meant for sleeping? (yes, no, decline to answer)
														Have you experienced problems getting childcare or elder care making it difficult for you to work or get to appointments? (yes, no, decline to answer)				Have you or your child not taken medications to save money? (yes, no, decline to answer)
AC	25	Tong, 2018	Clinician Experiences with Screening for Social Needs in Primary Care	USA	mixed	Seventeen primary care clinicians from 12 practices in Northern Virginia within one health system	[primary care] practices in Northern Virginia	No name - referred to as 'the social needs screening tool'	2	Adapted from NAM’s so- cial needs measures27 and supplemented with addi- tional questions from the Hennepin County Life- style survey43, the patient survey included questions on transportation, food access, physical activity, dental health, safety, education, housing, mental health, social connections, substance use, finances, employment, and overall quality of life (see Appen- dix A) patients we…	1	What is the highest level of school you have completed? (elementary school, high school, college, graduate/professional school, I choose not to answer this question)	1	In the past year, have you been uninsured or concerned about losing your health insurance? (yes, no, I choose not to answer this question)	1	Are you married, widowed, divorced, seperated, never married, or living with a partner? (married, seperated, widowed, never married, divorced, living with a partner, I choose not to answer)	1	When was you last dental appointment? (Less than a year ago, 1-2 years ago, Greater than 2 years ago, I choose not to answer this question)	1	Do you feel safe in your neighbourhood (Yes, No, I choose not to answer)	1	In the past 6 months, how often did the food you bought not last, and you didn't have money to buy more? (often, sometimes, never, I choose not to answer this question)			1	How often do you have access to transportation (all the time, some of the time, rarely, never, I choose not to answer this question)	1	Are you ever afraid that your spouse / partner or another person you live with might hurt you? (Yes, No, I choose not to answer)	Physical activity - On average, how many days per week do you engage in moderate to strenuous exercise (like walking fast, running, jogging, dancing, swimming, biking, or other activities that cause a light or heavy sweat? (Number of days per week from 0 to 7, i choose not to answer this question)
												Learning - Do any of these things make it hard for you to take good care of your health, choose all that apply? (Understanding what your provider tells you, remembering what your provider tells you, asking questions when you don't understand, seeing, hearing, getting in and out of the car, reading english, speaking english, writing english, none of these, Other [with free text option], I choose n…		During any part of the year, have you had trouble paying for medications, clinic visits, and / or supplies? (yes, no, I choose not to answer this question)		In a typical week, how many times do you talk on the telephone with family, friends, or neighbors? (Number of times [free text space], I choose not to answer this question)				Where are you living today? (Homeless, shelter, with a friend or family member, home/apartment, other [with free text space], I choose not to answer)									Physical activity - On average, how many minutes do you engage in exercise at this level (number of minutes, I choose not to answer this question)
														What is your current source of income (choose all that apply)? (employed full time, employed part time, homemaker, retired, unemployed, disabled, social security / government assistance, student, other [free text option], I choose not to answer this question)		In a typical week, how often do you get together with friends or relatives? (Number of times [free text space], I choose not to answer this question)				Are you ar risk to lose your housing? (Yes, no, I choose not to answer)
																Do you belong to any clubs or organizations such as church groups, unions, fraternal or athletic groups, or school groups? (Yes, no, I choose not to answer this question)				How concerned are you that you will not have a place to live sometime in the next 6 months? (Very, somewhat, not concerned, I choose not to answer)									Mental health - Over the past 2 weeks, how often have you been bothered by little interest or please in things? (not at all, several days, more than half the days, every day, I choose not to answer)
																How often do you attend church or religious services? (never, _ times per week [circle one: day / week / month / year], I choose not to answer this question)													Mental health - Over the past 30 days, how many times have you been bothered by feeling down, depressed, or hopeless (not at all, several days, more than half the days, every day, I choose not to answer)
																													Tobacco use - Do you smoke cigarettes every day, some days, or not at all? (every day, some days, not at all, do not know, I choose not to answer this question)
																													Alcohol use - how often do you have a drink containing alcohol? (never [skip to Question 24], 2 to 3 times a week, Monthly or less, 4 or more times a week, 2 to 4 times per month, I choose not to answer this question)
																													Alcohol use - How many standard drinks (one can of beer, glass of wine, or shot of liquor) containing alcohol do you have on a typical day? (1 or 2, 3 or 4, 5 or 6, 7 or 9, 10 or more, I choose not to answer this question)
																													Drugs - over the past year, how often have you used prescription drugs for non-medical reasons or in excess of how they were prescribed? (never, less than monthly, weekly, daily or almost daily, I choose not to answer this question)
																													Drugs - Over the past year, how often have you used illegal drugs (never, less than monthly, monthly, weekly, daily or almost daily, I choose not to answer this question)
																													Overall health - In general, would you say that your health is? (excellent, very good, good, fair, poor, I choose not to answer this question)
AC	26	Wallace, 2020	Implementing a Social Determinants Screening and Referral Infrastructure During Routine Emergency Department Visits, Utah, 2017–2018	USA	mixed	patients discharged from the emergency department [large academic center emergency department]	large academic center emer- gency department	No name - referred to as 'the social needs screening tool'	2	Leveraged an academic–community partnership to develop a social needs screening tool and referral process. Involved adapting 10 existing questions recommended by Health- Leads in their Social Needs Screening Toolkit.	2		1	Did you ever feel there was not enough money for items like clothing or furniture? [yes/no/prefer not to answer]	1	Have problems getting childcare or elder care made it difficult for your to work or get to appointments? [yes/no/prefer not to answer]	1	Have you needed to see a doctor but could not because it costs too much? [yes/no/prefer not to answer]	1	Was there a time when you were not able to pay your mortgage or rent? [yes/no/prefer not to answer]	1	Did you ever feel there was not enough money for food? [yes/no/prefer not to answer]	1	Was there a time when you were not able to pay your utility bills? [yes/no/prefer not to answer]	2		2
EK														Have you been unemployed and looking for work? [yes/no/prefer not to answer]				Have you ever not seen a doctor because you didn’t have a way to get to the clinic or hospital? [yes/no/prefer not to answer]		Have you slept outside, in a shelter, in a car, or any place not meant for sleeping? [yes/no/prefer not to answer]
																		Did you not take medications to save money? [yes/no/prefer not to answer]
AC	27	WursterOvalle, 2021	Social Risk Screening in Pediatric Primary Care Anticipates Acute Care Utilization	USA	paediatric	a retrospective cohort study, reviewing data within the EHR at Cincinnati Children's Hospital Medical Center, on children younger than 13 years attending for a well-child visit	Primary care sites [of the Cincinnati Children's Hospital Medical Center] include one located on the hospital's main campus (site A), another in a suburban neighborhood (site B), and a third in a nearby urban neighborhood (site C).	The EHR-embedded social risk screening questionnaire (SRS)	2	developed through review of validated questions and screens (ie, the Survey on Income and Program Participation, the Children's Food Security Scale, Primary Care Evaluation of Mental Disorders Procedures, and the Partner Violence Screen) and local consensus of primary care physicians, nurses, social workers, and legal advo- cates from our affiliated medical-legal partnership	2		2		2		2		1	Housing problems (overcrowding, roaches, rodents, utilities, mold, lead)? [Yes/No]	1	Do you worry that your food will run out before you get more money or food stamps to get more? [Yes/No]	2		2		1	Do you feel that you and/or your child are unsafe in your relationship? [Yes/No]	Over the past 2 weeks, have you felt down, depressed, or hopeless? [Yes/No]
																				Threatened with eviction or losing your home? [Yes/No]		Does the food you buy not last and you didn't have money to get more? [Yes/No]							Over the past 2 weeks, have you felt little interest or pleasure in doing things? [Yes/No]
																													Would you like to speak with a social worker ir a legal advocate in the clinic about these issues? [Yes/No]
EK	28	Berkowitz, 2016	Addressing basic resource needs to improve primary care quality: a community collaboration programme	USA	mixed	Primary care patients	two academic, hospital-based primary care practices within a practice-based research network in Boston, Massachusetts. These clinics had an existing complexcare management programme for high-risk Medicare patients	Health Leads	4		1	Do you ever need help reading hospital materials? Yes/No			1	Do problems getting child care make it difficult for you to work or study? (leave blank if you do not have children) Yes/No	1	In the last 12 months, have you needed to see a doctor, but could not because of cost? Yes/No	1	Are you worried that in the next 2 months, you may not have stable housing? Yes/No	1	In the last 12 months*, did you ever eat less than you felt you should because there wasn’t enough money for food? Yes/No	1	In the last 12 months, has the electric, gas, oil, or water company threatened to shut off your services in your home? Yes/No	1	In the last 12 months, have you ever had to go without health care because you didn’t have a way to get there? Yes/No			Are any of your needs urgent? For example: I don’t have food tonight, I don’t have a place to sleep tonight. Yes/No
																Do you often feel that you lack companionship? Yes/No
EK	29	Kusnoor, 2018	Collection of social determinants of health in the community clinic setting: a cross-sectional study	USA	mixed	Adult, English speaking patients, presenting to an urban community health care clinic	A healthcare center serving the underinsured population in Nashville, Tennessee, U.S.A..	PRAPARE	2	When possible, questions included in PRAPARE were obtained from validated instruments	1	What is the highest level of school that you have finished? Less than high school degree High school diploma or GED More than high school I choose not to answer this question	1	What is your current work situation? Unemployed Part-time or temporary work Full-time work Otherwise unemployed but not seeking work (ex: student, retired, disabled, unpaid primary care giver) Please write: I choose not to answer this question	1	How many family members, including yourself, do you currently live with? ___ / I choose not to answer this question	1	What is your main insurance? None/uninsured Medicaid CHIP Medicaid Medicare Other public insurance (not CHIP) Other Public Insurance (CHIP) Private Insurance	1	What is your housing situation today? I have housing I do not have housing (staying with others, in a hotel, in a shelter, living outside on the street, on a beach, in a car, or in a park) I choose not to answer this question	1	In the past year, have you or any family members you live with been unable to get any of the following when it was really needed? Check all that apply. Food Y/N Clothing Y/N Utilities Y/N Child Care Y/N Medicine or Any Health Care (Medical, Dental, Mental Health, Vision) Y/N Phone Y/N Other (please write): I choose not to answer this question			1	Has lack of transportation kept you from medical appointments, meetings, work, or from getting things needed for daily living? Check all that apply. Yes, it has kept me from medical appointments or from getting my medications Yes, it has kept me from non-medical meetings, appointments, work, or from getting things that I need No I choose not to answer this question	1	Do you feel physically and emotionally safe where you currently live? Yes / No / Unsure / I choose not to answer this question	Stress is when someone feels tense, nervous, anxious, or can’t sleep at night because their mind is troubled. How stressed are you? Not at all A little bit Somewhat Quite a bit Very much I choose not to answer this question			1	Are you Hispanic or Latino? Yes / No / I choose not to answer this question
														During the past year, what was the total combined income for you and the family members you live with? This information will help us determine if you are eligible for any benefits. ___ / I choose not to answer this question		How often do you see or talk to people that you care about and feel close to? (For example: talking to friends on the phone, visiting friends or family, going to church or club meetings) Less than once a week 1 or 2 times a week 3 to 5 times a week 5 or more times a week I choose not to answer this question				Are you worried about losing your housing? Yes / No / I choose not to answer this question								In the past year, have you been afraid of your partner or ex-partner? Yes No Unsure I have not had a partner in the past year I choose not to answer this question					What language are you most comfortable speaking?
														At any point in the past 2 years, has season or migrant farm work been your or your family’s main source of income? Yes / No / I choose not to answer this question		Are you a refugee? Yes / No / I choose not to answer this																	Which race(s) are you? Check all that apply: Asian Native Hawaiian Pacific Islander Black/African American White American Indian/Alaskan Native Other (please write): I choose not to answer this question
EK	30	Hensley, 2017	Addressing social determinants of health at a federally qualified health center	USA	mixed	In the past year, have you been afraid of your partner or ex-partner? Yes No Children and families attending a low-income clinic in Southern Ohio/Northern Kentucky	Primary care clinic within a federally qualified health center (FQHC) in Southwestern Ohio. FQHC care sites provide health care service regardless of the client’s ability to pay; largely serving patients in households with income at or less than the 200% poverty level	Health Begins	4		1	What is the highest level of school you have completed? i. Elementary school ii. High school iii. College iv. Graduate / Professional school	1	Choose one of the following. Which best describes your current occupation? i. Homemaker ii. Employed full-time iii. Employed part time iv. Employed, but on leave for health reasons v. Employed but temporarily away from my job (other than health reasons vi. Unemployed or laid off 6 months or less vii. Unemployed or laid off more than 6 months viii. Unemployed due to disability ix. Retired from my …	1	What is your marital status? Check one. i. Married ii. Living with partner iii. Widowed iv. Divorced v. Separated vi. Never married			1	In the last month, have you slept outside, in a shelter, or in a place not meant for sleeping? i. Yes ii. No	1	Which of the following describes the amount of food your household has to eat? i. Enough to eat ii. Sometimes not enough to eat iii. Often not enough to eat			1	How often is it difficult to get transportation to or from your medical or follow-up appointments? i. Does not apply ii. Never iii. Sometimes iv. Often v. Always	1	Do you have concerns about safety in your neighborhood? i. Yes ii. No	Stress means a situation in which a person feels tense, restless, nervous, or anxious, or is unable to sleep at night because his/her mind is troubled all the time. Do you feel this kind of stress these days? i. Not at all ii. A little bit iii. Somewhat iv. Quite a bit v. Very much
												b. What is the highest degree you earned? i. High school diploma ii. GED iii. Vocational certificate (post high school or GED) iv. Associate’s degree (junior college) v. Bachelor’s degree vi. Master’s degree vii. Doctorate		Do you ever have problems making ends meet at the end of the month? i. Yes ii. No		In a typical week, how many times do you talk on the telephone with family, friends, or neighbors?				In the last month, have you had concerns about the condition or quality of your housing? i. Yes ii. No								Within the last year, have you been humiliated or emotionally abused in other ways by your partner or ex-partner? i. Yes ii. No
												Are you concerned about your child’s learning, performance, or behavior in school? i. Yes ii. No iii. Not applicable		How hard is it for you to pay for the very basics like food, housing, medical care, and heating? Would you say it is: i. Very hard ii. Somewhat hard iii. Not hard at all		How often do you get together with friends or relatives? Number of times per week _____				In the last 12 months, how many times have you or your family moved from one home to another?								Within the last year, have you been afraid of your partner or ex-partner? i. Yes ii. No
																How often do you attend meetings of the clubs or organizations you belong to? i. Number of times per year _____												Within the last year, have you been raped or forced to have any kind of sexual activity by your partner or ex-partner? i. Yes ii. No
																Do you have concerns about any immigration matter for you or your family? i. Yes ii. No												Within the last year, have you been kicked, hit, slapped, or otherwise physically hurt by your partner or ex-partner? i. Yes ii. No
																How often do you attend religious or faith-based services? Number of times per year _____
EK	31	Page Reeves, 2016	Addressing Social Determinants of Health in a Clinic Setting: The WellRx Pilot in Albuquerque, New Mexico	USA	mixed	WellRx questionnaires were completed by 3048 patients attending the family medicine clinics	3 family medicine clinics in Albuquerque, New Mexico. Each of the clinics serves a large, low-income population	Well Rx	3	a pretested, 11-item questionnaire (available in English or Spanish), conformed to "low literacy" needs	1	Do you need help getting more education? Y / N	1	Are you unemployed or without regular income? Y / N	1	Do you need daycare, or better daycare, for your kids? Y / N			1	Are you homeless or worried that you might be in the future? Y / N	1	In the past 2 months, did you or others you live with eat smaller meals or skip meals because you didn’t have money for food? Y / N	1	Do you have trouble paying for your utilities (gas, electricity, phone)? Y / N	1	Do you have trouble finding or paying for a ride? Y/N	1	Is anyone in your home threatening or abusing you? Y / N	Are you concerned about someone in your home using drugs or alcohol? Y / N
																Do you need help finding a better job? Y / N				Do you feel unsafe in your daily life?
EK	32	Colvin, 2016	Multiple Behavior Change Intervention to Improve Detection of Unmet Social Needs and Resulting Resource Referrals	USA	paediatric	All pediatric or medicine-pediatric interns were eligible for study participation	Children’s Mercy Hospital, a 265-bed, freestanding children’s hospital	IHELLP: Income, Housing, Education, Legal Status, Literacy, Personal Safety Questionnaire	3	In this study, we sought to determine the validity of screening for social needs. Found high positive predictive value of Ihelp, but lower negative predictive value.	1	Do you have any concerns about your child’s educational needs?	1	Do you have any concerns about making ends meet?	1	What hospital was your child born in? If not in United States: Are you aware that your child may be eligible for benefits even though they were not born in the United States? If you would like, I can have a social worker come talk to you about some possible benefits your child may be eligible for. Would you like me to do that?	1	Do you have any concerns about your child’s health insurance?	1	Do you have any concerns about poor housing conditions like mice, mold, cockroaches?	1	Do you have any concerns about having enough food?					1	From speaking to families, I have learned that violence in the home is common and now I ask all families about violence in the home. Do you have any concerns about violence in your home?
																Are you the biological or adoptive mother or father of this child? If not, can you show me the power of attorney or guardianship document you have?				Do you have any concerns about not being able to pay your mortgage?		Within the past year has the food you bought ever not lasted and you didn’t have money to get more?*
																				Do you have any concerns about not being able to pay your mortgage?		Have you ever been worried whether your food would run out before you got money to buy more?
EK	33	Selvaraj, 2019	Screening for Toxic Stress Risk Factors at Well-Child Visits: The Addressing Social Key Questions for Health Study	USA	paediatric	Participants were English- and Spanish-speaking parents or guardians of 2-week to 17-year-old children attending wellchild visits (WCVs). Newborn visits (<14 days of life) were excluded to allow providers to establish a relationship with the family prior to screening for sensitive issues.	Academic pediatric primary care sites in Chicago, Illinois	ASK Tool (adapted from the WE CARE survey, Garg et al, 2007)	3	The ASK Tool was mainly developed from validated questions in the literature. The child resilience question, which is not validated, led to a large number of false positives	1	Do you have a high school degree or GED? Y / N	1	Do you need a job? Y / N	1	Do you need childcare for your child? (e.g. daycare, afterschool care, etc.)? Y / N					1	Do you always have enough food for your family? Y / N	1	In the last 12 months, have you been behind on your electricity, heating, or housing bill? Y / N
																Do you need legal advice to help with any problems? Y / N
EK	34	Uwmedimo, 2018	Disparities in Utilization of Social Determinants of Health Referrals Among Children in Immigrant Families Omolara T. Uwemedimo	USA	paediatric	Caregivers accompanying patients aged 0–18 years attending the Cohen’s Children’s Medical Center General Pediatric Practice (CCMC-GPP) for a preventive care visit	A large hospital-based pediatric ambulatory practice. Patients served by this practice are ethnically and socio-economically diverse; over two-thirds of patients receive health insurance coverage through Medicaid or Medicaid managed care.	FAMNEEDS	3	The FAMNEEDS tool was designed after rigorous review of multiple previously published tools used for universal SDH screening of families within healthcare practices. Prior to study implementation, multiple iterations including different question formats of the tool were tested with caregivers to assess understanding of question constructs, frequency and time duration for completion, particularly …	1	As an adult, have you wanted more education but were unable to get it?	1	Do you or your child need clothing, diapers, car seats, school supplies, or other items?	1	Do you want help getting public benefits: food stamps (SNAP), WIC, welfare or disability (SSI)?	1	Do you need help getting medical or dental insurance?	1	Do you worry that in the next 2 months, you/your faimily may not have a safe or stable place to live? Y/ N	1	Do you worry that you would run out of food before you got money to buy more? Y / N	1	Do you have trouble paying your bills (gas, medical bills, electricity, water, telephone)?	1	Do problems with transport stop you from going to medical visits or getting medications?	1	Do you feel unsafe or has anyone ever hurt/humiliated you or tried to control what you do?	Do you feel as thought you’ve been unfairly fired from you job?
												Do you ever need help understanding what your doctor tells you, or reading health infomration?				Do you need help getting childcare or care for an elderly or sick adult?				Where is your child living now? Private house/apartment Room (in apartment/house) Shelter Hotel/Motel No regular place Car Other									Have you often felt treated or judged unfairly because of your race, ethnicity, religioin or sexual orientation?
																Do you need help finding a fob?				Do you worry that the palce you are living in now is making you sick? Y / N If yes, choose all that appy: cigarette smoke / mold or dampness / rodents or bugs / peeling paint / broken appliances / open cracks, holes or wires / not enough heat / water leaks / none
																Do you have people near you that you can count on or to help you when you need help?
EK	35	Buitron de la Vega, 2019	Implementing an EHR-based Screening and Referral System to Address Social Determinants of Health in Primary Care	USA	mixed	All new primary care patients	An urban, tertiary care academic medical center and the largest safety net hospital in New England. Approximately 50% of BMC patients are insured by Medicaid	THRIVE Screening Tool	2		1	Are you interested in more education? Y / n	1	Are you currently unemployed and looking for a job? Y / N	1	Do you have trouble taking care of a child, family member or friend? Y / N	1	Do you have trouble paying for medicines? Y / N	1	Do you currently live in a shelter or have no steady place to sleep at night? Y / N	1	Within the past 12 months, the food you bought just didn’t last and you didn’t have money to get more. Y / N	1	Do you have trouble paying your heating or electricity bill? Y / N	1	Do you have trouble getting transportation to medical appointments? Y / N
																				Do you think you are at risk of becoming homeless?		Within the past 12 months, you worried whether your food would run out before you got money to buy more. Y / N
EK	36	Damas, 2022	Social barriers influence inflammatory bowel disease (IBD) outcomes and disproportionally affect Hispanics and non-Hispanic Blacks with IBD	USA	adult	Adult patients with an established diagnosis of IBD seen at one of the three gastroenterology clinics	The clinic sites included a tertiary referral center, a private gastroenterology (GI) community practice, and a safety-net county hospital-affiliated GI clinic.	Social Barriers Score	2		1	When you go to your doctor's office or to the hospital, are you comfortable filling out medical forms by yourself? Not comfortable at all / A little comfortable / Somewhat comfortable / quite comfortable / extremely comfortable	1	How hard is it to pay for the basics like food, housing, medical care, and heating? Very hard / somewhat hard / not hard at all	1	In a typical week, ow many times do you talk on the telephone with family, friends or neighbours? Never or no telephone / less than 1x/week / once a week / twice a week / 3+ times a week	1	Other than cost, have you delayed getting medical care for one of the following reasons in the past 12 months? (6 options)	1	What is your housing situation today? I do not have housing (staying with others, in a hotel, ina shelter, on the street, on a beach, in a care, abandoned building, bus or train station, in a park) I have housing today, but I am worried about loosing housing in the future I have housing	1	Within the past 12 months, you worried that your food would run out before you got money to buy more? Often truy / sometimes truc / never true / NA							Stress means a situation in which a person feels tense, restless, nervous or anxious, or is unable to sleep at night because his or her mind is troubled all the time. Do you feel this kind of stress these days? Not at all / somewhat / bery much / a little bit / quite a bit
																How often do you get together with friends or relatives? Never / less than 1x/week / once a week / twice a week / 3+ times a week						Within the past 12 months, howoften did the food you buy not last and you didn't have money to get more? Often truy / sometimes truc / never true / NA
																How often do you attend religious services? Never or do not belong / onve a year / twice a year / three times a year / 4+ times a year / decline to answer
																How often do you attend meetings of the clubs or organisations you belong to? Never or do not belong / onve a year / twice a year / three times a year / 4+ times a year / decline to answer
[truncated: 2 more columns]
